# Supplementary material for: OSlihc: An Online Prognostic Biomarker Analysis Tool for Hepatocellular Carcinoma
Source: Front Pharmacol. 2020 Jun 10;11:875. doi: 10.3389/fphar.2020.00875 (PMC7298068; doi:10.3389/fphar.2020.00875)
Supplement: Table S1 — Clinicopathologic Characteristics of LIHC patients in TCGA dataset. [file Table_1.xlsx]

## Sheet: Table S1
Table S1. Clinicopathologic Characteristics of LIHC patients in TCGA dataset.
TCGA		N = 361	Percentage
Age at diagnosis	Median	61
	Range	16 - 90
Gender	Male	244	0.68
	Female	117	0.32
Race	American Indian or Alaska Native	2	0.01
	Asian	156	0.43
	Black or African American	17	0.05
	White	176	0.49
	Unknown	10
Pathologic stage	Stage I	167	0.46
	Stage II	82	0.23
	Stage III	84	0.23
	Stage IV	4	0.01
	Unknown	24
Relative family cancer history	Yes	47	0.13
	No	203	0.56
	Unknown	111
Neoplasm histologic grade	G1	53	0.15
	G2	171	0.47
	G3	121	0.33
	G4	11	0.03
	Unknown	5
serum AFP (ng/mL)	≤20	142	0.39
	>20	129	0.36
	Unkown	90
Fibrosis ishak score	0 - No Fibrosis	72	0.2
	1,2 - Portal Fibrosis	31	0.09
	3,4 - Fibrous Speta	28	0.08
	5 - Nodular Formation and Incomplete Cirrhosis	9	0.02
	6 - Established Cirrhosis	70	0.19
	Unknown	151
HBVsAg	Positive	136	0.38
	Negative	22	0.06
	Unknown	203
History of hepatocarcinoma risk factors	Alcohol consumption	70	0.19
	Alcohol consumption & Non-Alcoholic Fatty Liver	6	0.02
	Alpha-1 Antitrypsin Deficiency	1
	Hemochromatosis	5	0.01
	Hepatitis B	75	0.21
	Hepatitis B & Alcohol consumption	20	0.06
	Hepatitis B & C	3	0.01
	Hepatitis B & C & Alcohol consumption	4	0.01
	Hepatitis B & Non-Alcoholic Fatty Liver	1
	Hepatitis C	32	0.09
	Hepatitis C & Alcohol consumption	14	0.04
	Hepatitis C & Alcohol consumption & Non-Alcoholic Fatty Liver	1
	Non-Alcoholic Fatty Liver	12	0.03
	Other	12	0.03
	No	86	0.24
	Unknown	19
