# Supplementary material for: OSlihc: An Online Prognostic Biomarker Analysis Tool for Hepatocellular Carcinoma
Source: Front Pharmacol. 2020 Jun 10;11:875. doi: 10.3389/fphar.2020.00875 (PMC7298068; doi:10.3389/fphar.2020.00875)
Supplement: Table S2 — Clinicopathologic Characteristics of LIHC patients in GEO datasets. [file Table_2.xlsx]

## Sheet: Table S2
Table S2. Clinicopathologic Characteristics of LIHC patients in GEO datasets.
GSE76427			N = 115	Percentage
Age		Median	64
		Range	14 - 93
Gender		Male	93	0.81
		Female	22	0.19
Stage	TNM Stage	Stage I	55	0.48
		Stage II	35	0.3
		Stage III	21	0.18
		Stage IV	3	0.03
		Unknown	1
	BCLC Stage	Stage 0	4	0.03
		Stage A	74	0.64
		Stage B	28	0.24
		Stage C	9	0.08
GSE20140			N = 80
Etiology	HBV	Negetive	60	0.75
		Positive	19	0.24
		Unknown	1
	HCV	Negetive	20	0.25
		Positive	58	0.73
		Unknown	2
	Alcohol (cumulative intake)	<100kg	15	0.19
		100-1000kg	27	0.34
		>1,000kg	5	0.06
		None	30	0.38
		Unknown	3
Pathology	Microvascular invasion	Absent	45	0.56
		Present	17	0.21
		Unknown	18
	Satellite lesions	Absent	59	0.74
		Present	3	0.04
		Unknown	18
